# Supplementary material
Source: MDPI journal article supplement (https://www.mdpi.com/2673-8449/3/4/16)
Supplement: s1 [file s1]

**Table S1.** Summary of the average glucose measurements and change in the plasma glucose (mmol/L) of the reference food and two test foods of Part A. Test foods for Part A are negative control = zero polyphenols, and sugar sample 1 = 25 mg/100 g polyphenols.

| Time (min)  | Glucose standard                     |                                   | Negative control                     |                                   | Sugar sample 1<br>25 mg/ 100g polyphenols |                                   |
|-------------|--------------------------------------|-----------------------------------|--------------------------------------|-----------------------------------|-------------------------------------------|-----------------------------------|
|             | Average glucose measurement (mmol/L) | Change in plasma glucose (mmol/L) | Average glucose measurement (mmol/L) | Change in plasma glucose (mmol/L) | Average glucose measurement (mmol/L)      | Change in plasma glucose (mmol/L) |
| 0.0         | 5.2 ± 0.0                            | 0.0                               | 5.0 ± 0.4                            | 0.0                               | 4.8 ± 1.5                                 | 0.0                               |
| 15          | 8.1 ± 0.1                            | 2.9                               | 7.7 ± 0.8                            | 2.5                               | 7.9 ± 0.9                                 | 2.7                               |
| 30          | 9.6 ± 0.1                            | 4.4                               | 8.8 ± 1.2                            | 3.6                               | 8.3 ± 1.4                                 | 3.1                               |
| 45          | 8.9 ± 0.1                            | 3.7                               | 7.4 ± 1.6                            | 2.2                               | 6.9 ± 1.8                                 | 1.7                               |
| 60          | 7.5 ± 0.1                            | 2.3                               | 5.6 ± 1.3                            | 0.4                               | 5.5 ± 1.3                                 | 0.3                               |
| 90          | 4.9 ± 0.1                            | -0.3                              | 4.4 ± 0.5                            | -0.8                              | 4.6 ± 0.4                                 | -0.6                              |
| 120         | 4.3 ± 0.2                            | -0.8                              | 4.5 ± 0.5                            | -0.7                              | 4.8 ± 0.4                                 | -0.4                              |
| AUC         | 218.9                                |                                   | 148.7                                |                                   | 126.3                                     |                                   |
| % Reduction |                                      |                                   | 32.1                                 |                                   | 42.3                                      |                                   |

**Table S2.** Summary of the average glucose measurements and change in the plasma glucose (mmol/L) of the reference food and two test foods of Part B. Test foods for Part A are sugar sample 2 = 19 mg/ 100 g polyphenols, and sugar sample 3 = 32 mg/100 g polyphenols.

| Time (min)  | Glucose standard                     |                                   | Sugar sample 2<br>19mg/100 g polyphenols |                                   | Sugar sample 3<br>32 mg/ 100g polyphenols |                                   |
|-------------|--------------------------------------|-----------------------------------|------------------------------------------|-----------------------------------|-------------------------------------------|-----------------------------------|
|             | Average glucose measurement (mmol/L) | Change in plasma glucose (mmol/L) | Average glucose measurement (mmol/L)     | Change in plasma glucose (mmol/L) | Average glucose measurement (mmol/L)      | Change in plasma glucose (mmol/L) |
| 0.0         | 5.1 ± 0.3                            | 0.0                               | 5.2 ± 0.4                                | 0.0                               | 5.2 ± 0.4                                 | 0.0                               |
| 15          | 7.8 ± 0.6                            | 2.7                               | 7.9 ± 1.0                                | 2.7                               | 7.7 ± 1.1                                 | 2.5                               |
| 30          | 8.8 ± 0.9                            | 3.7                               | 8.4 ± 1.1                                | 3.2                               | 8.0 ± 1.3                                 | 2.8                               |
| 45          | 7.9 ± 1.0                            | 2.8                               | 7.2 ± 1.3                                | 2.0                               | 6.6 ± 1.2                                 | 1.4                               |
| 60          | 7.0 ± 0.9                            | 1.9                               | 6.0 ± 1.2                                | 0.8                               | 5.5 ± 1.0                                 | 0.3                               |
| 90          | 5.6 ± 0.8                            | 0.4                               | 4.8 ± 1.1                                | -0.4                              | 4.9 ± 0.6                                 | -0.3                              |
| 120         | 4.7 ± 0.6                            | -0.4                              | 4.8 ± 0.5                                | -0.4                              | 5.0 ± 0.6                                 | -0.2                              |
| AUC         | 218.9                                |                                   | 141.8                                    |                                   | 112.8                                     |                                   |
| % Reduction |                                      |                                   | 27.4                                     |                                   | 42.3                                      |                                   |
